# Supplementary material
Source: HighWire-hosted journal article supplement (https://bmjopen.bmj.com/content/11/4/e045560)
Supplement: inline-supplementary-material-3 [file inline-supplementary-material-3.pdf]

## Supplement 3

### Details of unmet needs extracted from included studies

| No. | Year-First Author             | Country     | Sample size | Age                 | Time science stroke         | Measures                         | Unmet needs (category)                                                                                                                                                         | UM-total                                                                                     |
|-----|-------------------------------|-------------|-------------|---------------------|-----------------------------|----------------------------------|--------------------------------------------------------------------------------------------------------------------------------------------------------------------------------|----------------------------------------------------------------------------------------------|
| 1   | 2012-Tistad M                 | Sweden      | 175         | 68(14)              | 1 year                      | Single item                      | 33% unfulfilled rehabilitation needs                                                                                                                                           |                                                                                              |
| 2   | 2016-Ullberg T                | Sweden      | 37383       | 75.3/71.5           | 1 year                      | Single item                      | 21.5% unmet rehabilitation needs                                                                                                                                               |                                                                                              |
| 3   | 2017- Lee K                   | South Korea | 1099        | 77.2(6.7)           | NG                          | Sing item                        | 53.07% Home care rehabilitation needs                                                                                                                                          | Transformed data                                                                             |
| 4   | 2019-Vyas MV                  | Canada      | 5976        | 40-                 | NG                          | Single item                      | 15.08% The unmet health care needs were                                                                                                                                        |                                                                                              |
| 5   | 2019-Lehnerer S               | Germany     | 57          | 69.3(9.8)           | 2-3y                        | Nikolaus-score                   | 43% social unmet needs                                                                                                                                                         | Totally 97 unmet needs                                                                       |
| 6   | 1999-Scholte Op<br>Reimer WJM | Netherlands | 382<br>224  | <=69 186<br>>69 196 | 6 months                    | Semi-structured<br>questionnaire | 1) 8% Psychosocial support<br>2) 8% Physical therapy<br>3) 7% Home adaption<br>4) 6% Outdoor mobility<br>5) 5% ADL care<br>6) 5% Home help<br>7) 5% Aids<br>8) 0% Nursing care | 31% perceived at least one unmet care needs<br>45% perceived a demand for more types of care |
|     |                               |             |             |                     | 5 years                     |                                  | 1) 12% Home help<br>2) 1% Sociocultural care<br>3) 1% Day care                                                                                                                 | 20% perceived at least one unmet need                                                        |
| 7   | 2009-Jerome D                 | France      | 61          | 64(8.5)             | 1-2 years<br>Mean 17 months | Non-structured<br>questionnaire  | 1) 47% Family help<br>2) 45.9% External human help<br>3) 37% Instrumental device<br>4) 10% Information                                                                         | 54.1% need more help<br>41% depression                                                       |
| 8   | 2000-Nilsson AL               | Sweden      | 68          | 53                  | 2 years                     | A checklist with                 | 1) 66% Special support and service                                                                                                                                             |                                                                                              |

|    |                |             |     |    |                      |                                            |                                                                                                                                                                                                                                                                                                                                                                                                    |                                                                   |
|----|----------------|-------------|-----|----|----------------------|--------------------------------------------|----------------------------------------------------------------------------------------------------------------------------------------------------------------------------------------------------------------------------------------------------------------------------------------------------------------------------------------------------------------------------------------------------|-------------------------------------------------------------------|
|    |                |             |     |    |                      | 15 areas                                   | 2) 62% Leisure/spare time<br>3) 49% Diet/weight/exercise<br>4) 44% Social function<br>5) 41% Support to caregivers<br>6) 38% Self-care<br>7) 32% Housing<br>8) 32% Transportation<br>9) 29% Consultation with specialists<br>10) 28% Communication<br>11) 24% Mobility outdoors<br>12) 21% Economic counseling<br>13) 18% Work/education<br>14) 10% Cognitive function<br>15) 10% Mobility indoors |                                                                   |
| 9  | 2004-Boer H    | Netherlands | 166 | 64 | < 6 months           | A checklist with wide range                | 1) 92% Physical problems<br>2) 60% Emotional problems<br>3) 48% Cognitive problem<br>4) 40% Disease prevention<br>5) 31% Mobility<br>6) 23% Handicap<br>7) 22% services<br>8) 16% IADL<br>9) 3% Behavior problems                                                                                                                                                                                  | 97.59% reported problems totally 1419, Median number was 8 (5-11) |
| 10 | 2002-Kersten P | UK          | 315 | 55 | >1 year mean 3 years | Southampton Needs Assessment Questionnaire | 1) 45% Information needs (cause21, prevent19 treatment14, recovery13)<br>2) 24% Assistances with finance                                                                                                                                                                                                                                                                                           | Median number was 2 (0-6)<br>70% report unmet needs               |

|           |                                    |             |     |            |              |                             |                                                                                                                                                                                                                                                                                                                         |                                                                                                                                                                     |
|-----------|------------------------------------|-------------|-----|------------|--------------|-----------------------------|-------------------------------------------------------------------------------------------------------------------------------------------------------------------------------------------------------------------------------------------------------------------------------------------------------------------------|---------------------------------------------------------------------------------------------------------------------------------------------------------------------|
|           |                                    |             |     |            |              | (SNAQ)                      | 3) 19% Social activities<br>4) 17% Intellectual fulfilment<br>5) 16% Adaptations<br>6) 16% Vehicles<br>7) 15% Social life<br>8) 15% Physiotherapy                                                                                                                                                                       |                                                                                                                                                                     |
| <b>11</b> | 2003-Low JT                        | UK          | 135 | 52         | Mean 3 years | SNAQ                        | 1) 57% Information needs (cause34, prevention23 getting back to work19, recovery 20)<br>2) 34% Intellectual fulfillment<br>3) 33% Physiotherapy<br>4) 33% Help with finance<br>5) 33% Assistance with non-care activities                                                                                               | 88% reported unmet needs                                                                                                                                            |
| <b>12</b> | 2016-Boerboom W<br>(email contact) | Netherlands | 67  | 52.5(10.7) | 4 years      | SNAQ                        | 1) 67.2% Total unmet needs<br>2) 59.7% Information need<br>3) 20.9% Formal social services<br>4) 19.4% Mobility<br>5) 14.93% Voluntary Organizations<br>6) 13.43% Formal Health Services<br>7) 11.94% Housing<br>8) 11.94% Family<br>9) 10.45% Working or Training<br>10) 8.96% Social activities<br>11) 5.97% Finances | 67.2% had one or more unmet needs. Mean number of um was 3.5/ median of 2 (0-6)<br>23.9% depression<br>43.3% had mild cognitive impairment<br>67.2% were unemployed |
| <b>13</b> | 2014-Ward AB                       | UK          | 42  | 72(8.1)    | 8-60m        | Post stroke checklist (PSC) | 1) 75.6% Cognition                                                                                                                                                                                                                                                                                                      |                                                                                                                                                                     |

|    |             |           |     |          |         |              |                                                                                                                                                                                                                                                                             |                                                            |
|----|-------------|-----------|-----|----------|---------|--------------|-----------------------------------------------------------------------------------------------------------------------------------------------------------------------------------------------------------------------------------------------------------------------------|------------------------------------------------------------|
| 14 |             |           |     |          |         |              | 2) 73.2% Mood<br>3) 70.7% Life after stroke<br>4) 65.9% Spasticity<br>5) 63.4% Absence of Secondary prevention<br>6) 56.1% Mobility<br>7) 51.2% ADLs<br>8) 43.9% Communication<br>9) 41.5% Continence<br>10) 39.0% Pain<br>11) 29.3% Carer relationship                     |                                                            |
|    |             | Singapore | 100 | 61(10.9) | 9-36m   | PSC          | 1) 24.0% Cognition<br>2) 21.3% Mood<br>3) 21.3% Pain<br>4) 17.3% Mobility<br>5) 16.7% Life after stroke<br>6) 14.7% Spasticity<br>7) 12.0% ADLS<br>8) 11.3% Continence<br>9) 10.0% Carer Relationship<br>10) 9.3% Absence of secondary prevention<br>11) 7.3% Communication |                                                            |
|    | 2018-Crow J | UK        | 21  | 72       | 2 weeks | PSC 12 items | 1) 28.57% mood<br>2) 23.80% secondary prevention<br>3) 19.04% cognitive impairments<br>4) 19.04% ADLs                                                                                                                                                                       | 52% participants identified unmet needs<br>Median number 3 |

|    |                   |       |    |              |                              |     |                                                                                                                                                                                                                                                                                 |                                                                               |
|----|-------------------|-------|----|--------------|------------------------------|-----|---------------------------------------------------------------------------------------------------------------------------------------------------------------------------------------------------------------------------------------------------------------------------------|-------------------------------------------------------------------------------|
|    |                   |       |    |              |                              |     | 5) 14.26% Pain<br>6) 14.26% Mobility<br>7) 14.26% Life after stroke<br>8) 19.04% Spasticity<br>9) 9.52% relationships with family<br>10) 4.76% Communication<br>11) 4.76% Incontinence<br>12) 4.76% Sexuality                                                                   | (1-6)<br>48% participants needed referral to local neurorehabilitation teams. |
| 15 | 2018-Iosa M       | Italy | 64 | 69.17(12.39) | 3.5m-15 years<br>38.4(30.4)m | PSC | 1) 53.1% Mobility<br>2) 50% Mood<br>3) 43.7% ADL<br>4) 42.2% Spasticity<br>5) 40.6% Absence of Secondary prevention<br>6) 37.5% Pain<br>7) 34.4% Cognition<br>8) 28.1% Continence<br>9) 26.6% Communication<br>10) 26.6% Life after stroke, sex<br>11) 21.9% Carer relationship |                                                                               |
| 16 | 2018-De Bartolo D | Italy | 53 | 65.76(13.50) | 3.3m-21 years                | PSC | 1) 56.6% Increased spasticity<br>2) 45.28% Secondary prevention<br>3) 45.28% Mobility<br>4) 47.17% Reduced independence in ADL<br>5) 45.28% Reduced mobility<br>6) 43.40% Cognition<br>7) 41.51% Mood                                                                           | on phone                                                                      |

|    |                                  |         |     |                          |           |                                       |                                                                                                                                                                                                                                                     |                                                                                                    |
|----|----------------------------------|---------|-----|--------------------------|-----------|---------------------------------------|-----------------------------------------------------------------------------------------------------------------------------------------------------------------------------------------------------------------------------------------------------|----------------------------------------------------------------------------------------------------|
|    |                                  |         |     |                          |           |                                       | 8) 32.08% Carer relationship<br>9) 33.96% Communication<br>10) 30.19% Continence<br>11) 22.64% Life after stroke, sex                                                                                                                               |                                                                                                    |
| 17 | 2018-Hotter B<br>(email contact) | Germany | 57  | 69.3(9.8)                | 2-3y      | PSC                                   | 1) 61% Cognitive deficits<br>2) 35% Spasticity<br>3) 20% Depression<br>4) 18% Social needs<br>5) 14% Medication compliance                                                                                                                          | 95% report at least one unmet need                                                                 |
| 18 | 2019- Kjörk EK                   | Sweden  | 46  | 70(41-85)                | 3m (1-84) | PSC                                   | 1) 61% Life after stroke<br>2) 56% Cognition<br>3) 41% Mood<br>4) 39% ADL<br>5) 30% Secondary prevention<br>6) 33% Mobility<br>7) 26% Communication<br>8) 24% Spasticity<br>9) 24% Pain<br>10) 20% Relationship with family<br>11) 17% Incontinence | 87% have problems<br>Median 4 problems/patients<br>30% need information about secondary prevention |
| 19 | 2011-Mckeivitt C                 | UK      | 799 | 69.9(12.3)<br>66.3(13.0) | 1 year    | Questionnaire of Long-term care needs | 1) 59% Memory problem unmet<br>2) 54% Information needs cause, prevention re<br>3) 43% Concentration problem<br>4) 43% Fatigue problem<br>5) 39% Emotional problem needs unmet                                                                      | Definition of Unmet needs<br>51% reported no unmet needs<br>Median number of                       |

|    |                    |       |                 |             |           |                                                                 |                                                                                                                                                                                                                                                                                                                                                             |                                                                                           |
|----|--------------------|-------|-----------------|-------------|-----------|-----------------------------------------------------------------|-------------------------------------------------------------------------------------------------------------------------------------------------------------------------------------------------------------------------------------------------------------------------------------------------------------------------------------------------------------|-------------------------------------------------------------------------------------------|
|    |                    |       |                 |             |           |                                                                 | 6) 34% Reading difficulty<br>7) 28% Speaking difficulty<br>8) 26% Sight problems<br>9) 25% Mobility problem<br>10) 21% Falls<br>11) 21% Incontinence problems<br>12) 15% Pain problems                                                                                                                                                                      | unmet needs was 3 (1-13)                                                                  |
| 20 | 2013- Rothwell K   | UK    | 137             | 72.6(40-93) | 6 months  | Greater Manchester Stroke Assessment Tool GM-SAT                | 1) 34.3% Fatigue<br>2) 25.5% memory, concentration and attention<br>3) 21.9% Secondary prevention non-lifestyle<br>4) 19.0% Depression.<br>5) 18.2% Benefits and finances<br>6) 13.1% Exercise<br>7) 7.3% Smoking<br>8) 6.6% Diet<br>9) 4.4% Nutrition<br>10) 5.1% Alcohol<br>11) 2.9% Medication management<br>12) 1.5% Foot care<br>13) 0.7% Will-Walking | 92% has unmet needs<br>Mean number of unmet needs was 3 (0-14)<br>Totally 464 unmet needs |
| 21 | 2018-Groeneveld IF | Dutch | 78 (resp 53.8%) | 61.7(13.8)  | 5-8 years | the Longer-term Unmet Needs after Stroke (LUNS) monitoring tool | 1) 46.2% Information on stroke<br>2) 21.8% Fear of falling<br>3) 21.8% Help with concentration/ memory<br>4) 19.2% Difficulties walking<br>5) 16.7% Help with applying for benefits                                                                                                                                                                         | median number of unmet needs was 3.5 (2.0-5.0; 1.0-14.0)<br>67.9% indicated               |

|    |                   |        |     |    |          |                                                    |                                                                                                                                                                                                                                                                                                                                                                                                                                                                                                                                                                                                                   |                              |
|----|-------------------|--------|-----|----|----------|----------------------------------------------------|-------------------------------------------------------------------------------------------------------------------------------------------------------------------------------------------------------------------------------------------------------------------------------------------------------------------------------------------------------------------------------------------------------------------------------------------------------------------------------------------------------------------------------------------------------------------------------------------------------------------|------------------------------|
|    |                   |        |     |    |          |                                                    | 6) 16.7% Medication/blood checkup<br>7) 15.4% Help with mood<br>8) 14.1% Pain<br>9) 14.1% Bladder or bowel problems<br>10) 12.8% Advice on diet<br>11) 11.5% Information on holidays<br>12) 11.5% Information on public transport<br>13) 10.3% Help in household<br>14) 10.3% Need for aids/adaptations inside<br>15) 10.3% Help with personal care<br>16) 10.3% Advice on daily occupations<br>17) 7.7% Information on moving to another home<br>18) 5.1% Help with managing money<br>19) 3.8% Advice on physical relationship<br>20) 2.6% Need for aids/adaptations outsides<br>21) 2.6% Information on driving | having 1 or more unmet needs |
| 22 | 2020- Ytterberg C | Sweden | 110 | 63 | >6 years | Stroke Survivor Needs Survey Questionnaire (SSNSQ) | 1) 47% Fatigue problem<br>2) 45% Mobility problem<br>3) 35% Concentration problems<br>4) 30% Falls<br>5) 29% Emotion problem<br>6) 29% Memory problems<br>7) 22% Incontinence problem<br>8) 22% Speaking difficulties<br>9) 19% Pain                                                                                                                                                                                                                                                                                                                                                                              | Rehabilitation needs         |



|    |                |       |     |    |     |                                  |                                                                                                                                                                                                                                                                                                                                                                                                                                                                        |  |
|----|----------------|-------|-----|----|-----|----------------------------------|------------------------------------------------------------------------------------------------------------------------------------------------------------------------------------------------------------------------------------------------------------------------------------------------------------------------------------------------------------------------------------------------------------------------------------------------------------------------|--|
|    |                |       |     |    |     |                                  | 10) 18% Sight difficulties<br>11) 12% Reading difficulties                                                                                                                                                                                                                                                                                                                                                                                                             |  |
| 23 | 2004-Pierce LL | USA   | 24  | 56 | NG  | Questionnaire of self-care needs | 1) 71% Preventing falls<br>2) 63% Maintaining adequate nutrition<br>3) 63% Staying active<br>4) 58% Managing stress<br>5) 50% Dealing with emotional and mood changes<br>6) 46% Managing roles<br>7) 46% Learning activities to increase dexterity, memory<br>8) 42% Preventing constipation or elimination<br>9) 42% Understanding stroke diseases<br>10) 38% Dealing with communication problems<br>11) 38% Dealing with behavior<br>12) 29% Learning about exercise |  |
| 24 | 2010-Bai GF    | China | 346 | 60 | All | Questionnaire                    | 1) 83.82% Information<br>2) 78.03% Community rehabilitation<br>3) 39.02% Psychological care needs<br>4) 37.57% Social participation skills<br>5) 23.99% Transform help<br>6) 77.75% Mobility<br>7) 63.01% Self-care needs<br>8) 42.77% Walking instrument<br>9) 34.97% Cognitive<br>10) 30.55% Tableware modification                                                                                                                                                  |  |

|    |               |         |     |                     |            |               |                                                                                                                                                                                                                                                                                                                                                                  |                                                                           |
|----|---------------|---------|-----|---------------------|------------|---------------|------------------------------------------------------------------------------------------------------------------------------------------------------------------------------------------------------------------------------------------------------------------------------------------------------------------------------------------------------------------|---------------------------------------------------------------------------|
|    |               |         |     |                     |            |               | 11) 27.75% Acupuncture<br>12) 11.56% Swallowing                                                                                                                                                                                                                                                                                                                  |                                                                           |
| 25 | 2011-Jiang H  | China   | 110 | 67.47(12.02)        | 7 (1-12) m | Questionnaire | 1) 70.9% Mobility<br>2) 60.9% Self-care ability training needs<br>3) 47.59% Rehabilitation needs                                                                                                                                                                                                                                                                 |                                                                           |
| 26 | 2012-Zhang ZX | China   | 177 | 67.3(10.8)          | >1 year    | Questionnaire | 1) 72.73% Information<br>2) 64.19% Rehabilitation needs<br>3) 68.13% Social support                                                                                                                                                                                                                                                                              |                                                                           |
| 27 | 2012-Gao CH   | China   | 127 | 62.61               | All        | Questionnaire | 1) 96.85% Information<br>2) 75.59% Community rehabilitation<br>3) 77.17% Physical therapy<br>4) 44.09% Acupuncture or massage<br>5) 25.19% Psychological care needs                                                                                                                                                                                              |                                                                           |
| 28 | 2015-Walsh ME | Ireland | 196 | 61.9(13.9)<br>24-89 | 3m-19years | Questionnaire | 1) 77% information about secondary prevention<br>2) 68% Information about cause<br>3) 68% information about diet<br>4) 66.7% help with housing tasks<br>5) 53% Emotions<br>6) 52% fatigue<br>7) 50% need help with personal care<br>8) 48% concentration<br>9) 48% writing<br>10) 45% bladder/bowel<br>11) 45% memory<br>12) 40% reading<br>13) 39% arm function | 78% having unmet health needs<br>median number of unmet needs was 3 (1-5) |

|    |                |           |     |    |           |               |                                                                                                                                                                                                                                                                           |                                                                                |
|----|----------------|-----------|-----|----|-----------|---------------|---------------------------------------------------------------------------------------------------------------------------------------------------------------------------------------------------------------------------------------------------------------------------|--------------------------------------------------------------------------------|
|    |                |           |     |    |           |               | 14) 34% falling<br>15) 32% speech<br>16) 32% mobility<br>17) 31% swallowing<br>18) 27% sight<br>19) 25% pain                                                                                                                                                              |                                                                                |
| 29 | 2014-Andrew NE | Australia | 765 | 68 | 2 years M | Questionnaire | 1) 84% Health domain<br>2) 60% Work domain<br>3) 52% Support domain<br>4) 38% Financial domain<br>5) 34% Living domain                                                                                                                                                    | 84% reported needs not be fully met<br><br>median number of needs was 4 of 20) |
|    |                |           |     |    |           |               | 1) 78% Concentration<br>2) 77% Memory<br>3) 75% Fatigue<br>4) 73% Emotions<br>5) 75% Cognition<br>6) 69% Reading<br>7) 64% Vision<br>8) 58% Speech<br>9) 54% Pain<br>10) 53% Transport<br>11) 52% Incontinence<br>12) 46% Falls<br>13) 46% Mobility<br>14) 44% Swallowing |                                                                                |

|    |                         |           |     |            |          |                                        |                                                                                                                                                                                                                                                                                                                                                                                        |                                                                              |
|----|-------------------------|-----------|-----|------------|----------|----------------------------------------|----------------------------------------------------------------------------------------------------------------------------------------------------------------------------------------------------------------------------------------------------------------------------------------------------------------------------------------------------------------------------------------|------------------------------------------------------------------------------|
|    |                         |           |     |            |          |                                        | 15) 64% Leisure needs<br>16) 39% Home help<br>17) 19% home adaptation<br>18) 17% Personal care                                                                                                                                                                                                                                                                                         |                                                                              |
| 30 | 2016-<br>Kamalakannan S | India     | 50  | 58.9(10.5) | <6 weeks | Questionnaire                          | 1) 82.0% Information needs<br>2) 70.9% Financial needs<br>3) 63.6% Physical symptoms<br>4) 59.1% Rehabilitation services<br>5) 58.3% Community support<br>6) 52.4% Psychological needs<br>7) 50.0% Transfers and mobility<br>8) 46.7% Social/recreational needs<br>9) 33.4% Employment needs<br>10) 31.6% Self-care needs<br>11) 24.0% Social interaction<br>12) 23.1% Home management | 82% unmet needs                                                              |
| 31 | 2017- Olaiya MT         | Australia | 335 | 73 M       | >2 year  | Questionnaire<br>self-<br>administered | 1) 72.5% Secondary prevention<br>2) 60.6% Body function<br>3) 50.6% Post-acute care<br>4) 50.0% Activities and participation<br>5) 42.7% Environmental factors                                                                                                                                                                                                                         | 87.6% reported at<br>least one unmet<br>need                                 |
| 32 | 2018-Jamison J          | UK        | 596 | 72.7       | 7.7m     | Questionnaire                          | 1) 49.8% Prescriptions and collection of<br>medicines<br>2) 36.4% Reminding to take medicines<br>3) 34.1% Checking that medicines have been                                                                                                                                                                                                                                            | 44.5% reported<br>unmet needs at<br>least one aspect of<br>taking medication |

|  |  |  |  |  |  |  |                                                                                                                                           |  |
|--|--|--|--|--|--|--|-------------------------------------------------------------------------------------------------------------------------------------------|--|
|  |  |  |  |  |  |  | taken<br>4) 20.2% Swallowing medicines<br>5) 27.9% Getting medicines out of the box or packet<br>6) 34.7% Missing taking their medicines. |  |
|--|--|--|--|--|--|--|-------------------------------------------------------------------------------------------------------------------------------------------|--|
